# Supplementary material
Source: publisher figshare collection journal article supplement (https://sage.figshare.com/ndownloader/files/12404591)
Supplement: Supplementary file 1 [file 12404591]

### Appendix 3. Sensitivity analyses.

| <b>Sensitivity analysis</b>                         | <b>All trials</b><br>(41 studies, n=16,364) | <b>Trials reporting WLST</b><br>(8 studies, n=932) | <b>Trials NOT reporting WLST</b><br>(33 studies, n=15,432) |
|-----------------------------------------------------|---------------------------------------------|----------------------------------------------------|------------------------------------------------------------|
| Mortality rates in the control groups               | 22% (1,755/8,043)                           | 15% (65/432)                                       | 22% (1,690/7,611)                                          |
| Trials with positive result for the primary outcome | 23/41 (56%) n=1,926                         | 5/8 (63%) n=338                                    | 18/33 (55%) n=1,588                                        |
| Trials evaluating drugs                             | 24/41 (59%) n=12,588                        | 6/8 (75%) n=386                                    | 18/33 (55%) n=12,202                                       |
| Trials with industry funding*                       | 9/30 (30%) n=1,849                          | 3/7 (43%) n=142                                    | 6/23 (26%) n=1,707                                         |
| Journal impact factor > 5                           | 16/41 (39%) n=13,918                        | 3/8 (38%) n=644                                    | 13/33 (39%) n=13,274                                       |
| Date of publication after 2008                      | 24/41 (59%) n=3,613                         | 7/8 (88%) n=834                                    | 17/33 (52%) n=2,779                                        |

\* Source of funding was not reported in 11 trials.
